# Supplementary material
Source: publisher figshare collection journal article supplement (https://gsajournals.figshare.com/ndownloader/files/22603397)
Supplement: Supplementary file 1 [file 22603397]

## Sheet: Domesticated Network
Table S5: Domesticated fiber network modules
Module	Number of Members	Average kME
0	409	0.020862
1	12442	0.712186
2	11639	0.73785
3	5633	0.669859
4	3190	0.715138
5	2666	0.699414
6	2138	0.737599
7	1941	0.735307
8	1126	0.785845
9	1094	0.786399
10	949	0.745721
11	789	0.783701
12	767	0.808797
13	485	0.775555
14	466	0.737234
15	461	0.783681
16	378	0.747031
17	303	0.761891
18	272	0.75857
19	259	0.74546
20	255	0.762438
21	255	0.755597
22	216	0.721813
23	215	0.7499
24	213	0.759857
25	209	0.725782
26	199	0.771896
27	182	0.755188
28	169	0.740195
29	148	0.790075
30	147	0.825809
31	135	0.829321
32	122	0.771804
33	111	0.842311
34	104	0.800879
35	99	0.797571
36	94	0.794172
37	82	0.747859
38	81	0.797547
39	80	0.781032
40	78	0.779868
41	78	0.788663
42	65	0.74461
43	64	0.825224
44	57	0.767684
45	49	0.795738
46	42	0.850683
47	40	0.841567

## Sheet: Wild Network
Table S5: Wild fiber network modules
Module	Number of Members	Average kME
0	191	0.0128334
1	10300	0.759841
2	9280	0.764756
3	1699	0.709507
4	1653	0.757996
5	1517	0.735121
6	1387	0.714725
7	1291	0.721139
8	1202	0.724365
9	1197	0.748496
10	1027	0.703802
11	1026	0.74579
12	989	0.752212
13	786	0.747854
14	739	0.72537
15	702	0.704403
16	649	0.715048
17	646	0.74596
18	546	0.778662
19	521	0.761486
20	510	0.735637
21	504	0.674769
22	490	0.721757
23	463	0.756604
24	422	0.758262
25	397	0.759159
26	392	0.772038
27	377	0.764968
28	359	0.758418
29	355	0.788566
30	337	0.747794
31	315	0.690133
32	304	0.764197
33	279	0.734406
34	265	0.720184
35	261	0.824934
36	245	0.787348
37	231	0.748683
38	219	0.703894
39	211	0.773244
40	206	0.784874
41	205	0.752674
42	198	0.747836
43	184	0.761435
44	183	0.754224
45	183	0.74132
46	174	0.771082
47	167	0.755621
48	163	0.772882
49	159	0.760214
50	158	0.746151
51	156	0.765176
52	155	0.820572
53	152	0.753955
54	151	0.709029
55	147	0.773182
56	141	0.738658
57	141	0.784408
58	135	0.769233
59	134	0.818522
60	133	0.711835
61	133	0.800063
62	129	0.787211
63	127	0.797594
64	118	0.747801
65	106	0.75617
66	105	0.760546
67	104	0.76613
68	104	0.751957
69	100	0.792547
70	96	0.788316
71	91	0.784881
72	90	0.696694
73	88	0.823597
74	85	0.799424
75	81	0.795145
76	81	0.771265
77	74	0.726127
78	73	0.810548
79	71	0.807075
80	71	0.791308
81	70	0.738712
82	66	0.85918
83	66	0.786393
84	64	0.708679
85	63	0.792549
86	61	0.839937
87	58	0.832491
88	58	0.777318
89	56	0.846135
90	54	0.795284
91	53	0.791821
92	53	0.811318
93	52	0.776963
94	50	0.777805
95	50	0.804436
96	49	0.707225
97	49	0.767523
98	45	0.806364
99	44	0.767101
100	43	0.819818
101	42	0.743836
102	39	0.750955
103	37	0.839885
104	36	0.826397
105	35	0.826326
106	34	0.828209
107	33	0.782156
